# Supplementary material for: Assay Development and Identification of the First Plasmodium falciparum 7,8-dihydro-6-hydroxymethylpterin-pyrophosphokinase Inhibitors
Source: MDPI journal article supplement (doi:10.3390/molecules27113515), 2022-05-30

## Supplementary materials

**Figure S1. Compounds characterization**

Signals at 3.4 ppm and 2.5 ppm on the  $^1\text{H}$  NMR spectra correspond to water and DMSO, respectively. Signal at 40 ppm on the  $^{13}\text{C}$  NMR spectra correspond to DMSO.

- $^1\text{H}$  (400 MHz,  $\text{DMSO}-d_6$ ) and  $^{13}\text{C}$  (101 MHz,  $\text{DMSO}-d_6$ ) NMR spectra and DART-TOF HRMS spectrum of (*E*)-6-Methoxy-5-((3-nitrophenyl)diazenyl)pyrimidine-2,4-diamine (**1**)

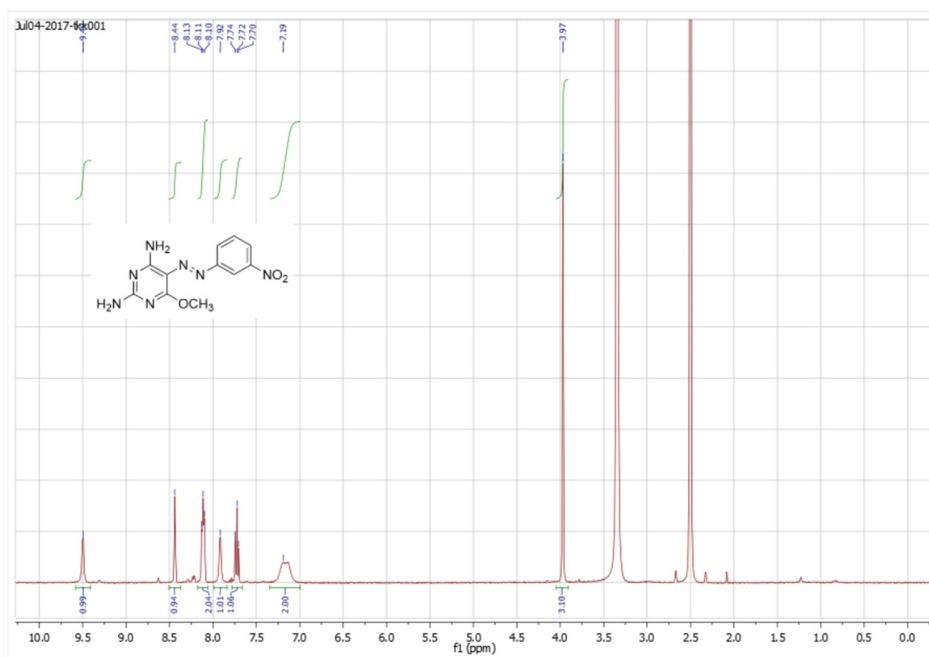

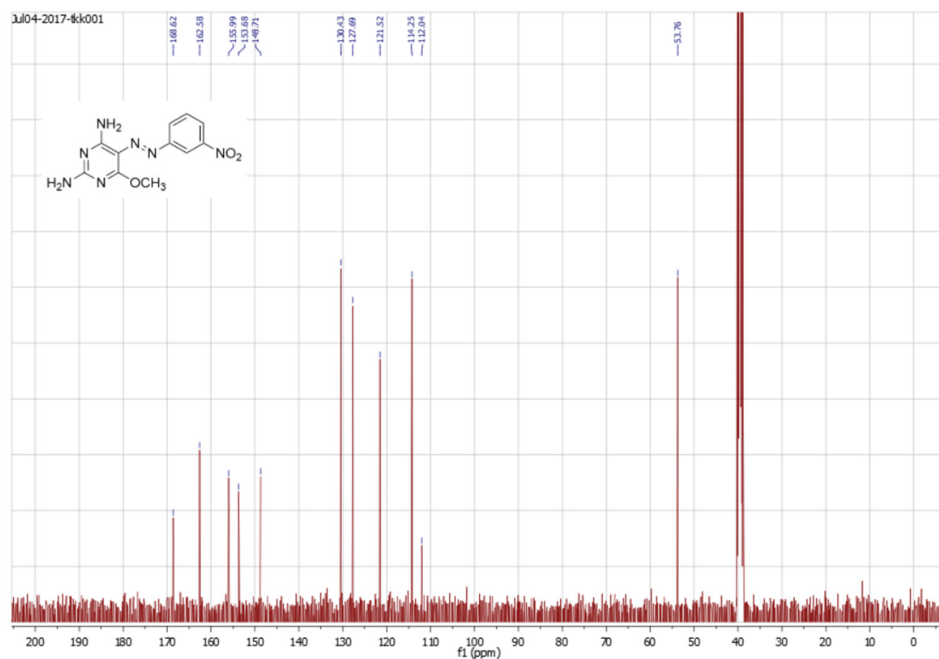

Acq. Data Name: 20220218\_high\_B17342\_40V  
 Creation Parameters: Average[MS[1] Time:1.13..1.21]-1.0\*Average[MS[1] Time:0.02..0.15]  
 Comment:

Experiment Date/Time: 2/18/2022 12:17:21 PM  
 Ionization Mode: ESI+  
 Acquired m/z Range: 100.00..1000.00  
 Detector Volt: 2000[V]  
 Orifice1 Volt: 40V

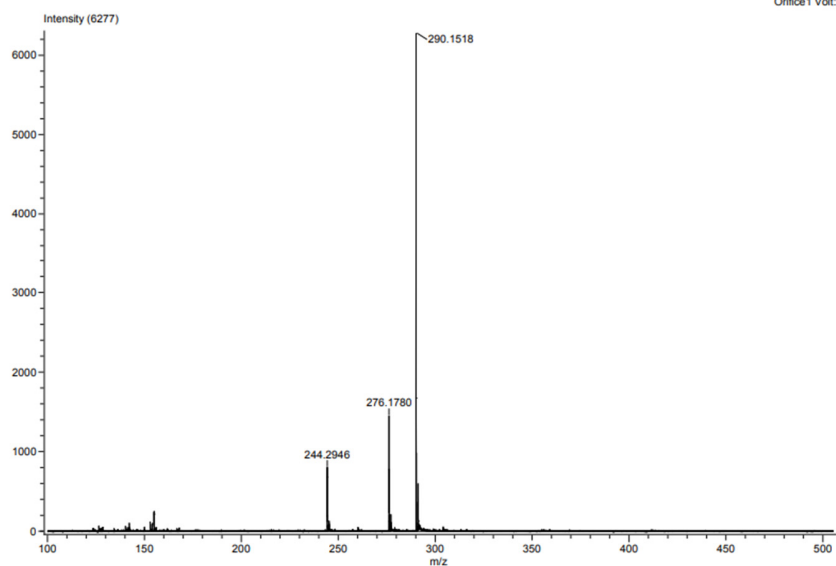

- $^1\text{H}$  (400 MHz,  $\text{DMSO}-d_6$ ) and  $^{13}\text{C}$  (101 MHz,  $\text{DMSO}-d_6$ ) NMR spectra and DART-TOF HRMS spectrum of methyl (*E*)-3-((2,4-diamino-6-chloropyrimidin-5-yl)diazenyl)benzoate (**2**)

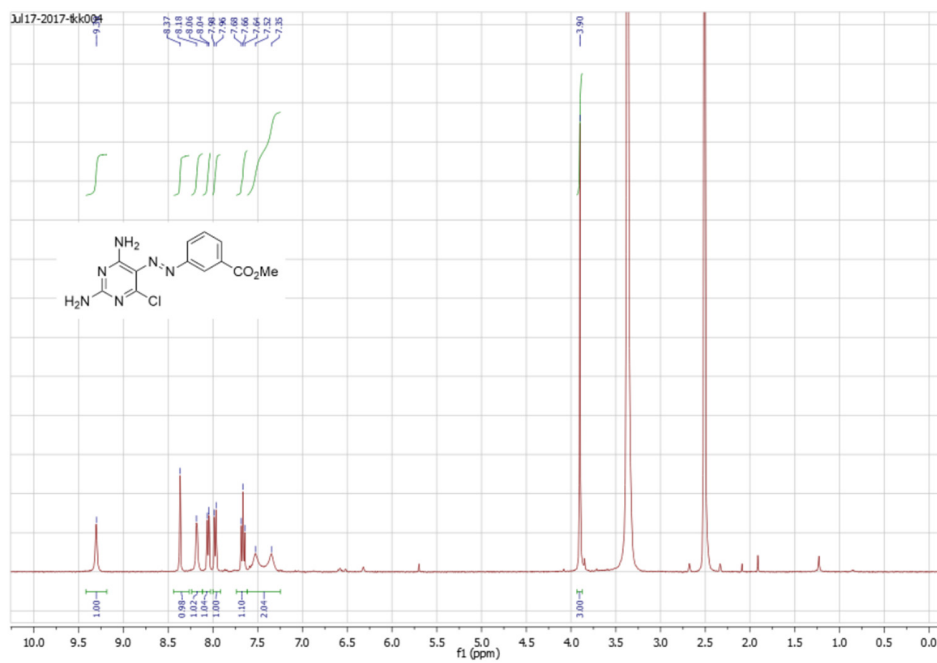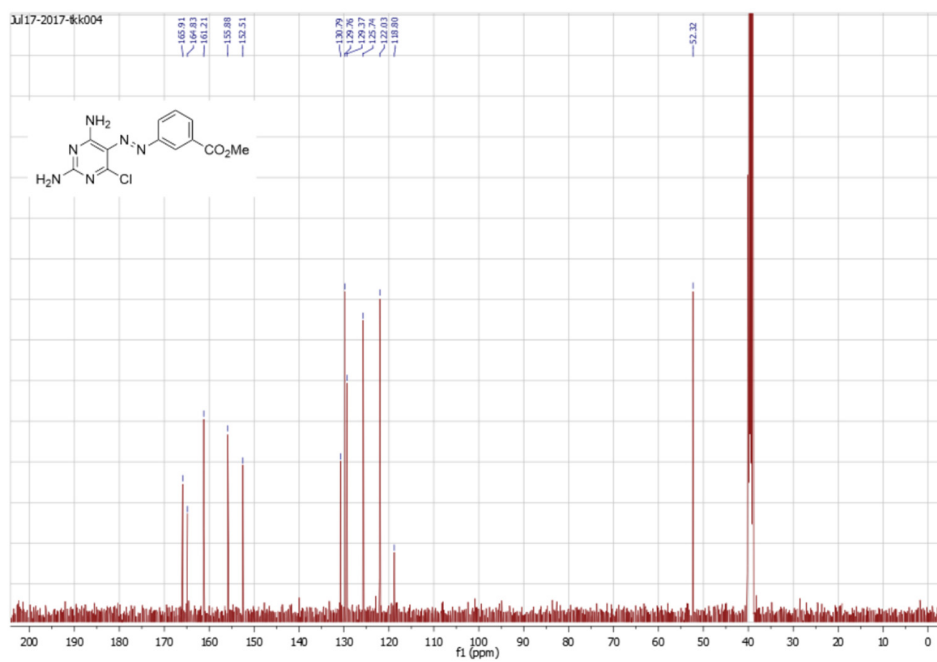

Acq. Data Name: 20220218\_high\_B17343\_40V  
 Creation Parameters: Average(MS[1] Time:0.92..1.18)-1.0\*Average(MS[1] Time:0.02..0.14)  
 Comment:

Experiment Date/Time: 2/18/2022 12:13:43 PM  
 Ionization Mode: ESI+  
 Acquired m/z Range: 100.00..1000.00  
 Detector Volt: 2000[V]  
 Orifice1 Volt: 40V

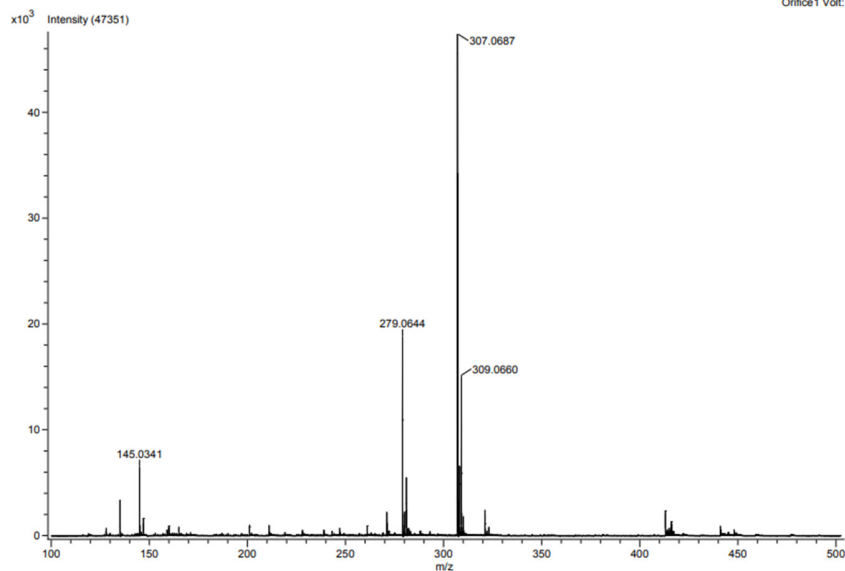

- <sup>1</sup>H (400 MHz, **DMSO-d<sub>6</sub>**) and <sup>13</sup>C (101 MHz, **DMSO-d<sub>6</sub>**) NMR spectra and DART-TOF HRMS spectrum of (*E*)-3-((2,4-diamino-6-methoxypyrimidin-5-yl)diazenyl)benzoic acid (**3**)

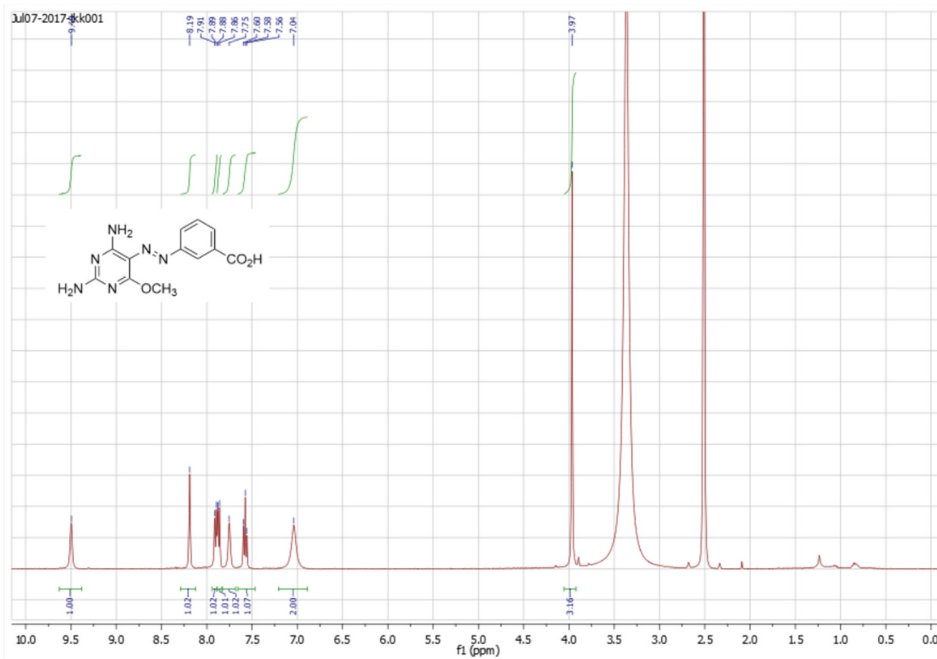

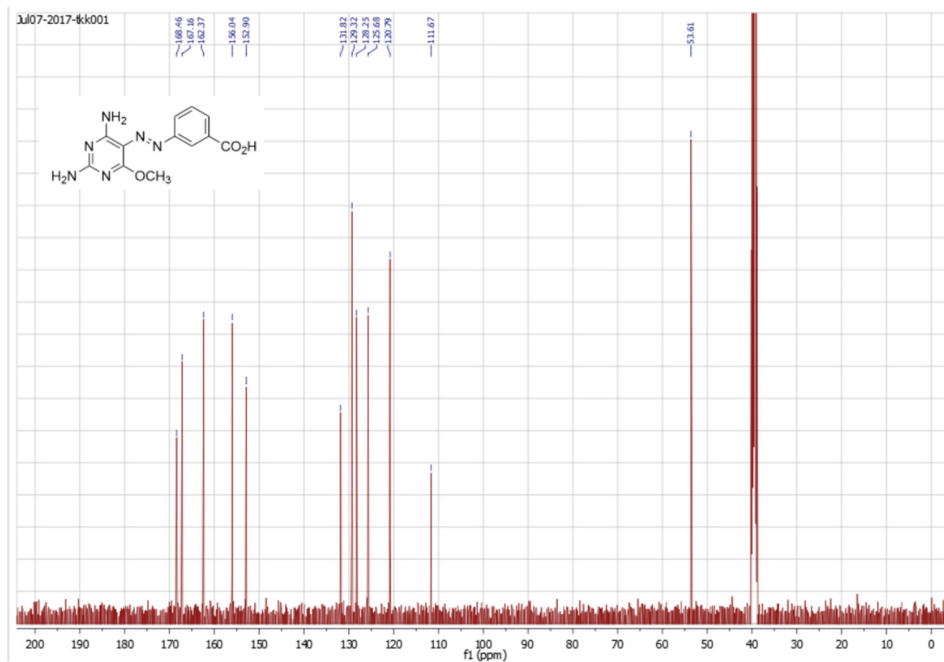

Acq. Data Name: 20220315\_high\_B17344\_70V  
 Creation Parameters: Average(MS[1] Time:0.91..1.41)-1.0\*Average(MS[1] Time:0.02..0.19)  
 Comment:

Experiment Date/Time: 3/15/2022 2:44:20 PM  
 Ionization Mode: ESI+  
 Acquired m/z Range: 100.00..1000.00  
 Detector Volt: 2000[V]  
 Orifice1 Volt: 70V

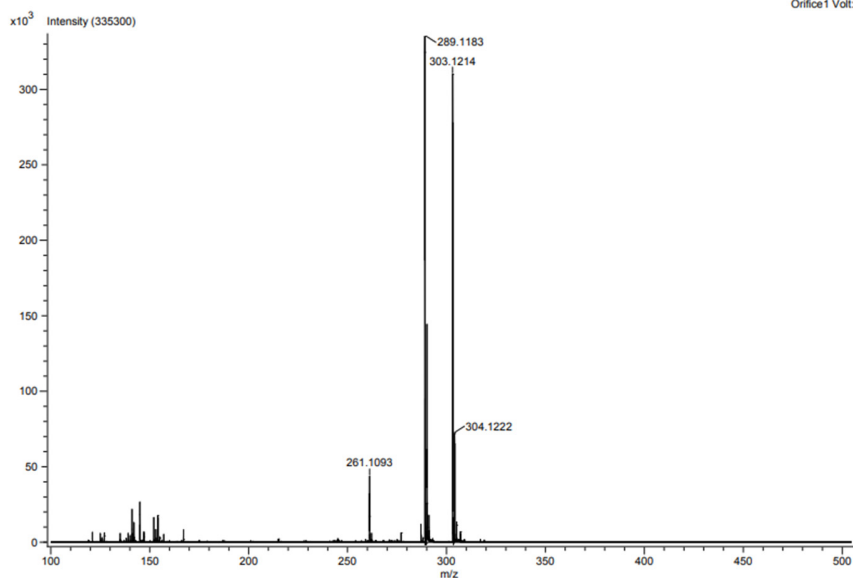

- $^1\text{H}$  (400 MHz,  $\text{DMSO-}d_6$ ) and  $^{13}\text{C}$  (400 MHz,  $\text{DMSO-}d_6$ ) NMR spectra and DART-TOF HRMS spectrum of (*E*)-5-(phenyldiazenyl)pyrimidine-2,4,6-triamine (**4**)

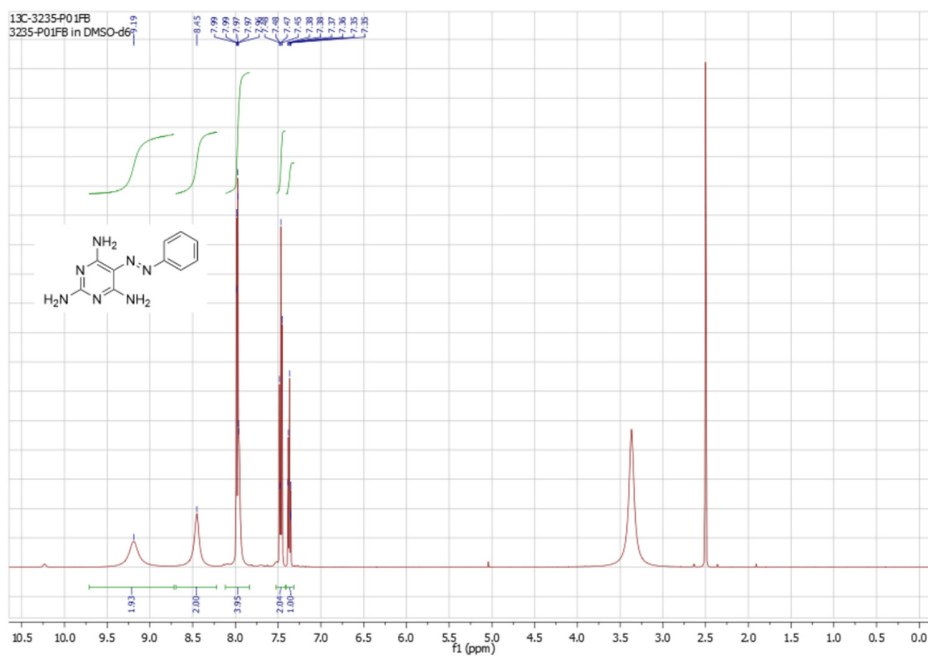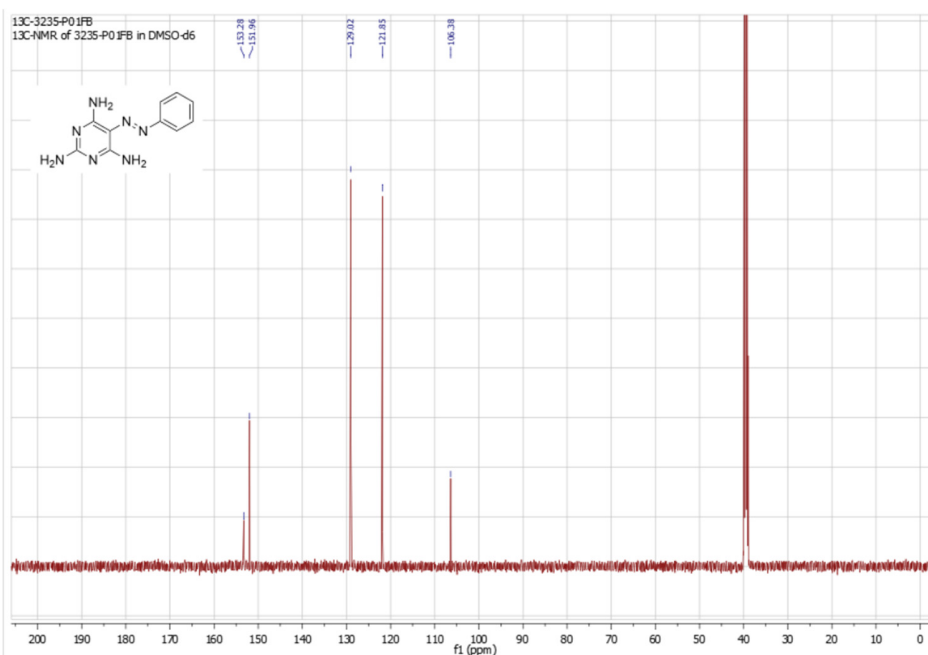

Acq. Data Name: 20220315\_high\_B17364\_70V  
 Creation Parameters: Average[MS1] Time:0.97..1.58-1.0\*Average[MS1] Time:0.02..0.15  
 Comment:

Experiment Date/Time: 3/15/2022 2:47:46 PM  
 Ionization Mode: ESI+  
 Acquired m/z Range: 100.00..1000.00  
 Detector Volt: 2000[V]  
 Orifice 1 Volt: 70V

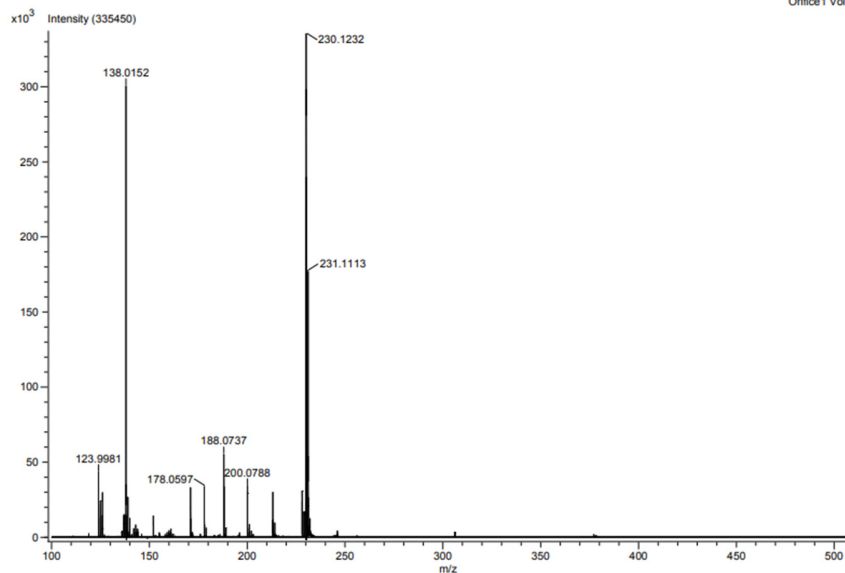

- $^1\text{H}$  (400 MHz,  $\text{DMSO}-d_6$ ) and  $^{13}\text{C}$  (101 MHz,  $\text{DMSO}-d_6$ ) NMR spectra and DART-TOF HRMS spectrum of (*E*)-3-((2,4,6-triaminopyrimidin-5-yl)diazenyl)benzoic acid (**5**)

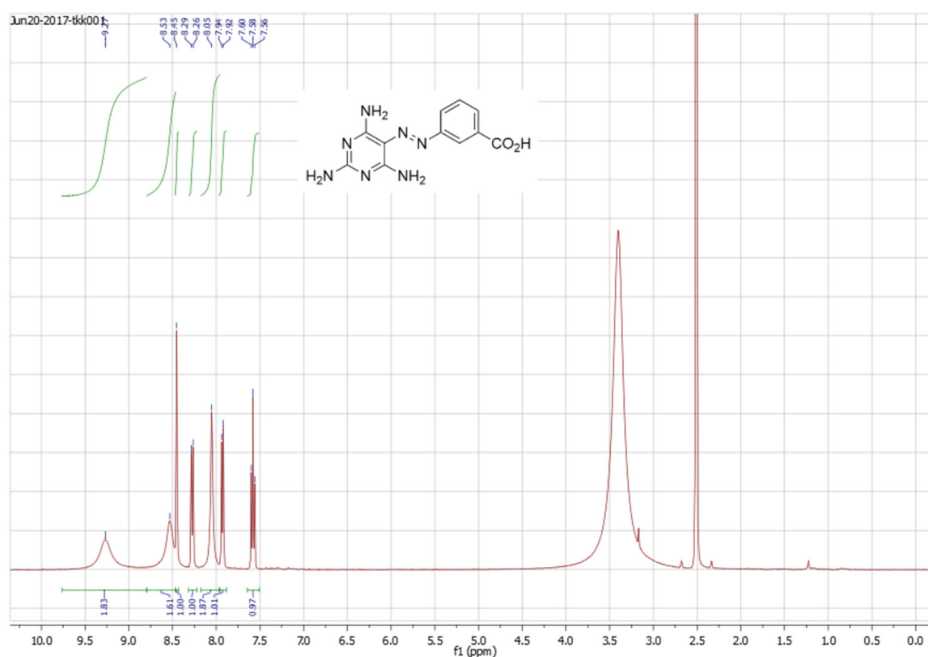

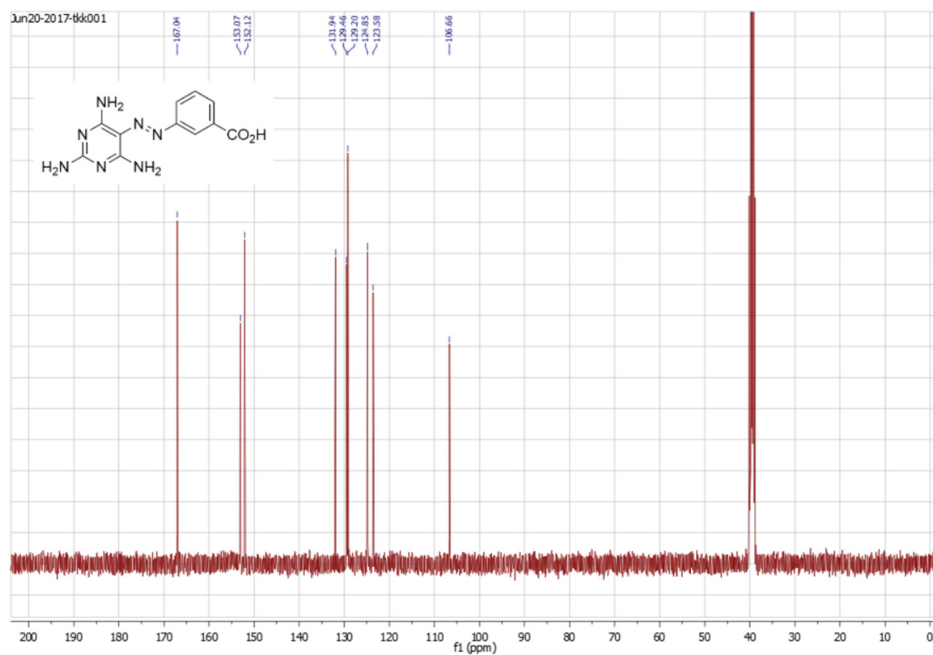

Acq. Data Name: 20220315\_high\_S17330\_70V  
 Creation Parameters: Average(MS[1] Time:0.88..1.51)-1.0\*Average(MS[1] Time:0.02..0.15)  
 Comment:

Experiment Date/Time: 3/15/2022 2:50:57 PM  
 Ionization Mode: ESI+  
 Acquired m/z Range: 100.00..1000.00  
 Detector Volt: 2000[V]  
 Orifice1 Volt: 70V

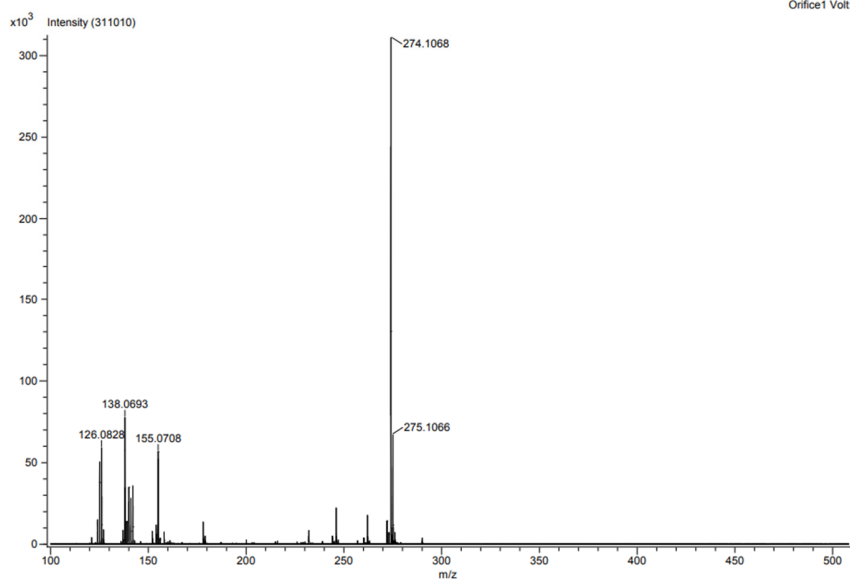



- <sup>1</sup>H (500 MHz, DMSO-*d*<sub>6</sub>) and <sup>13</sup>C (126 MHz, DMSO-*d*<sub>6</sub>) NMR spectra and DART-TOF HRMS spectrum of 4-((2-amino-4-methyl-6-oxo-1,6-dihydropyrimidin-5-yl)methyl)-1H-1,2,3-triazol-1-yl)benzoic acid (**6**)

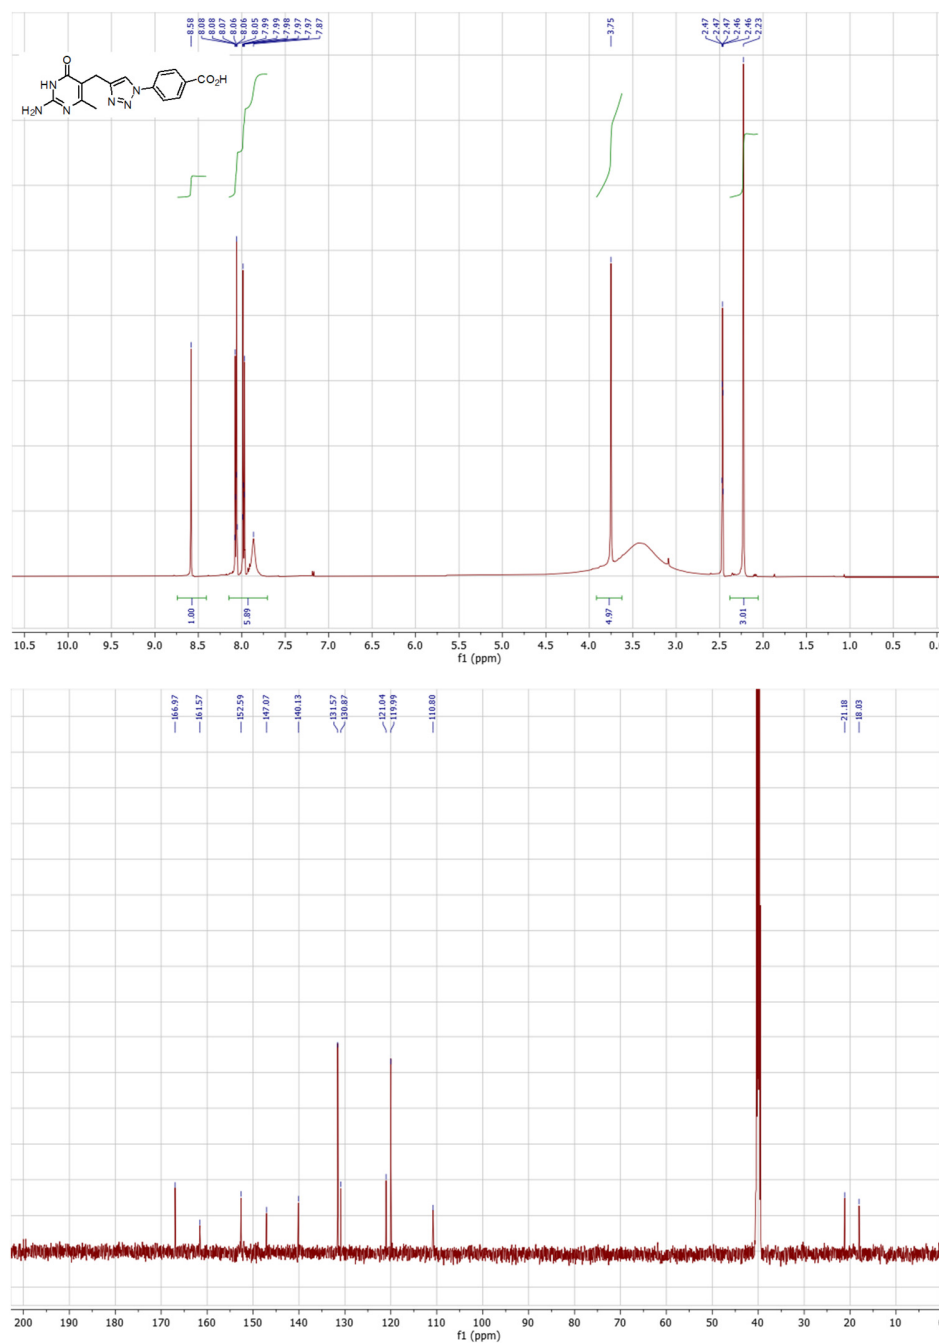

Acq. Data Name: 20220315\_high\_B12102\_40V  
 Creation Parameters: Average(MS[1] Time:1.44..1.73)-1.0\*Average(MS[1] Time:0.07..0.14)  
 Comment:

Experiment Date/Time: 3/15/2022 3:00:12 PM  
 Ionization Mode: ESI+  
 Acquired m/z Range: 100.00..1000.00  
 Detector Volt: 2000[V]  
 Orifice1 Volt: 40V

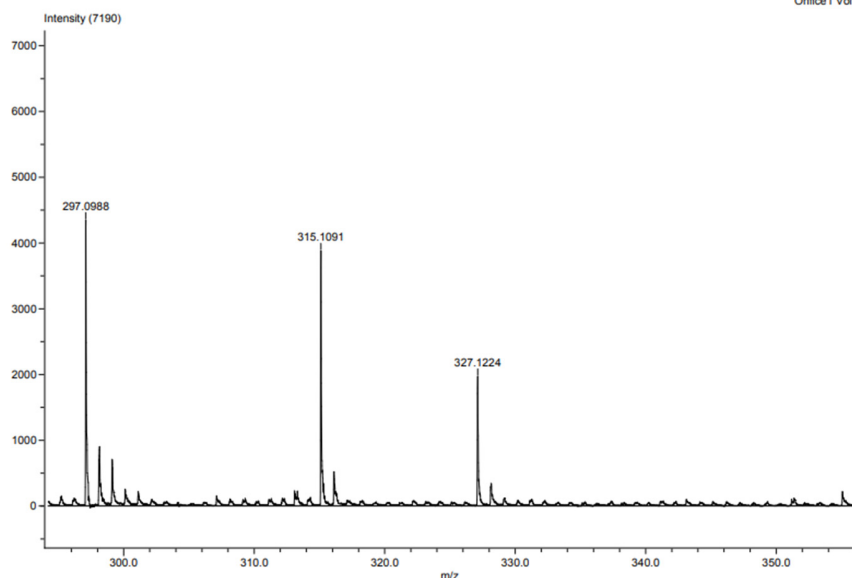

- $^1\text{H}$  (500 MHz,  $\text{DMSO}-d_6$ ) and  $^{13}\text{C}$  (126 MHz,  $\text{DMSO}-d_6$ ) NMR spectra and DART-TOF HRMS spectrum of 3-(4-((2-amino-4-methyl-6-oxo-1,6-dihydropyrimidin-5-yl)methyl)-1H-1,2,3-triazol-1-yl)benzoic acid (**7**)

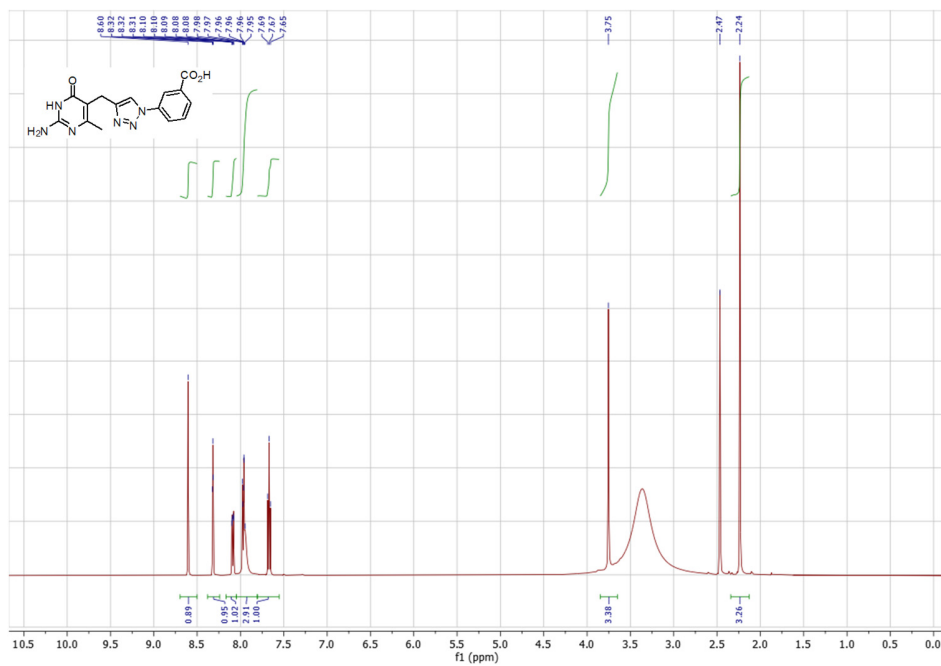

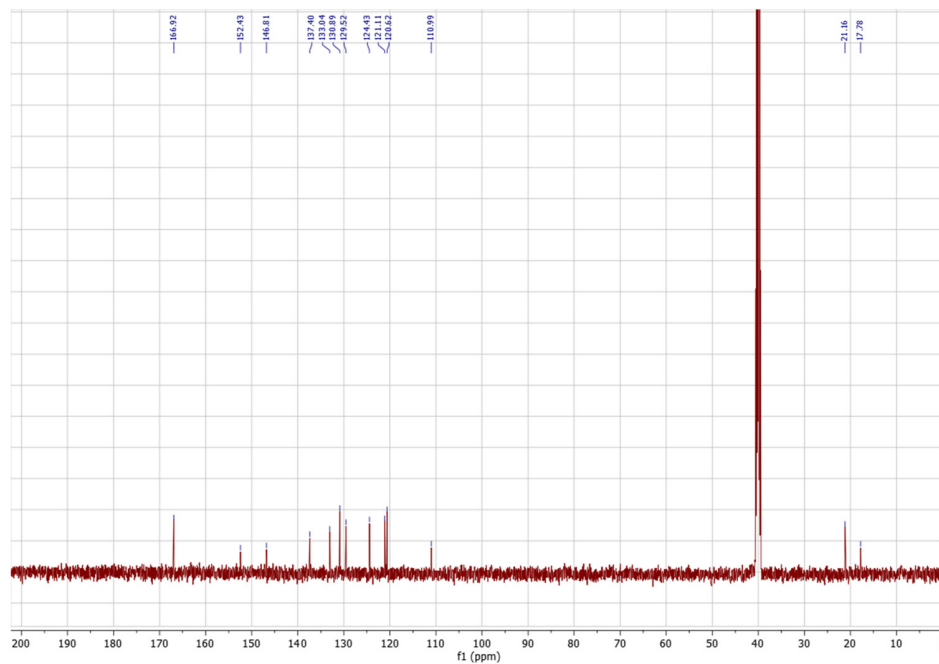

Acq. Data Name: 20220315\_high\_B12103\_40  
 Creation Parameters: Average[MS[1] Time:1.20..1.47]-1.0\*Average[MS[1] Time:0.02..0.17]  
 Comment:

Experiment Date/Time: 3/15/2022 3:12:24 PM  
 Ionization Mode: ESI+  
 Acquired m/z Range: 100.00..1000.00  
 Detector Volt: 2000[V]  
 Orifice1 Volt: 40V

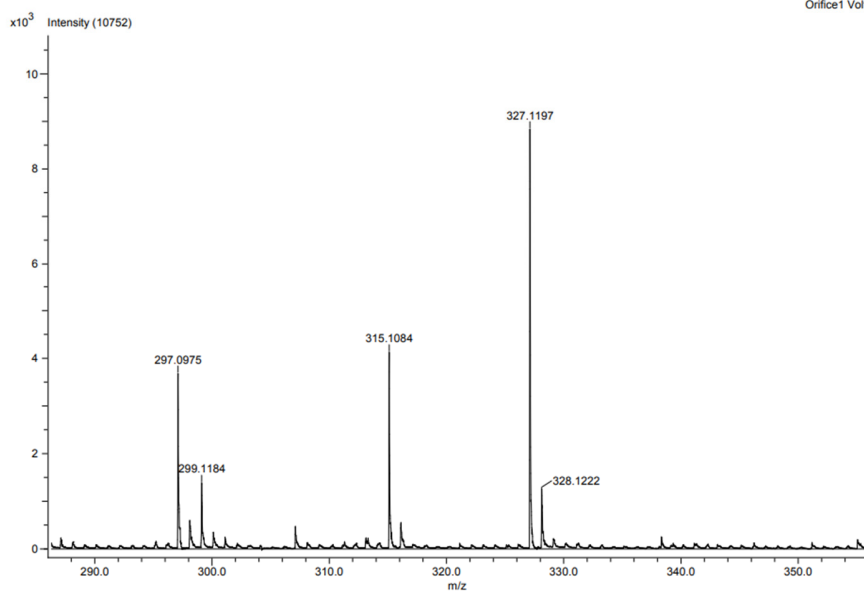

- $^1\text{H}$  (500 MHz,  $\text{DMSO-}d_6$ ) and  $^{13}\text{C}$  (126 MHz,  $\text{DMSO-}d_6$ ) NMR spectra and DART-TOF HRMS spectrum of 4-(4-((2-amino-4-ethyl-6-oxo-1,6-dihydropyrimidin-5-yl)methyl)-1H-1,2,3-triazol-1-yl)benzoic acid (**8**)

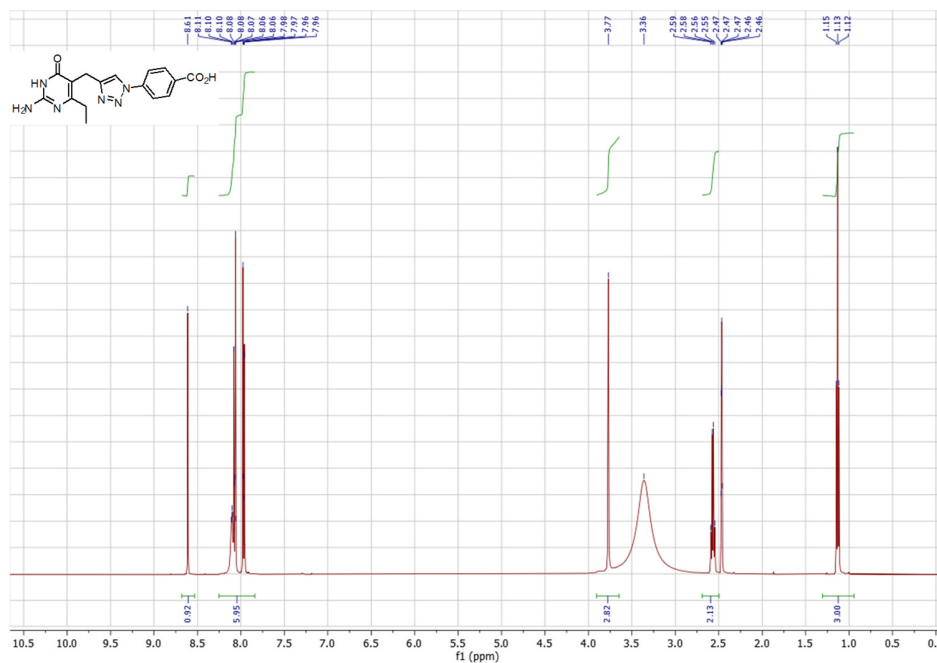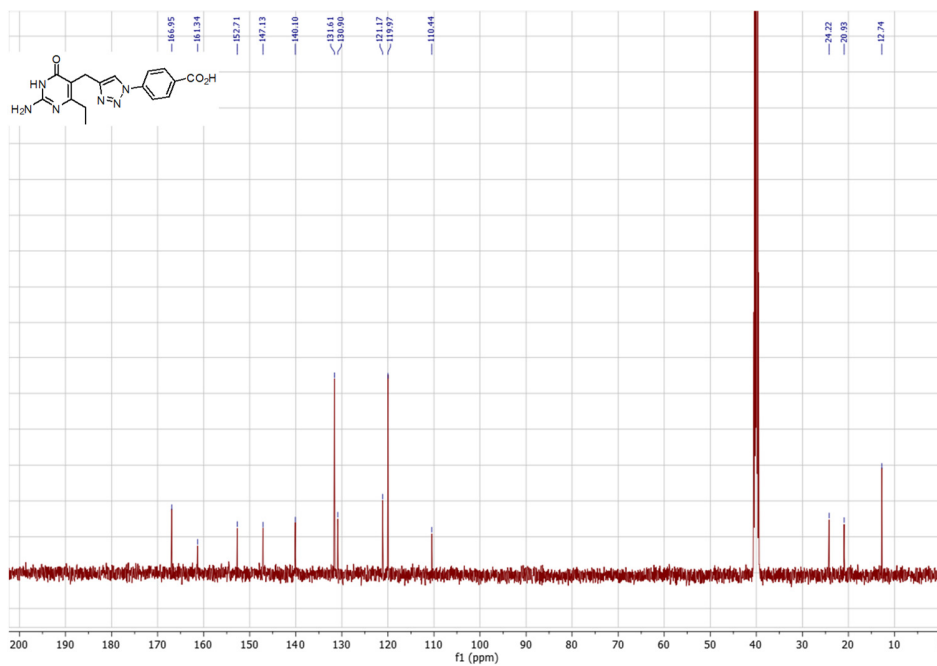

Acq. Data Name: 20220315\_high\_B12100\_40V  
 Creation Parameters: Average[MS<sup>1</sup>] Time:1.45-.1.84)-1.0\*Average[MS<sup>1</sup>] Time:0.02-.0.18)  
 Comment:

Experiment Date/Time: 3/15/2022 3:41:32 PM  
 Ionization Mode: ESI+  
 Acquired m/z Range: 100.00-1000.00  
 Detector Volt: 2000[V]  
 Orifice1 Volt: 40V

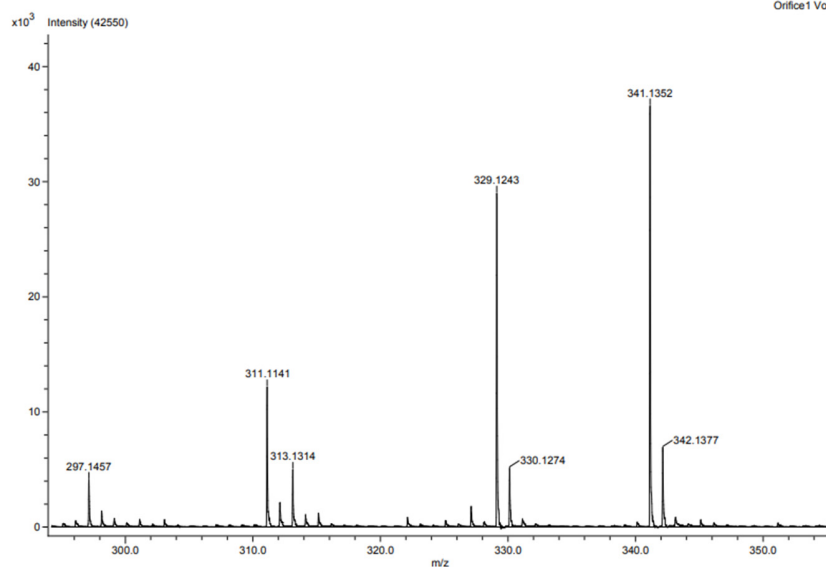

- <sup>1</sup>H (500 MHz, DMSO-*d*<sub>6</sub>) and <sup>13</sup>C (126 MHz, DMSO-*d*<sub>6</sub>) NMR spectra and DART-TOF HRMS spectrum of 3-(4-((2-amino-4-ethyl-6-oxo-1,6-dihydropyrimidin-5-yl)methyl)-1H-1,2,3-triazol-1-yl)benzoic acid (**9**)

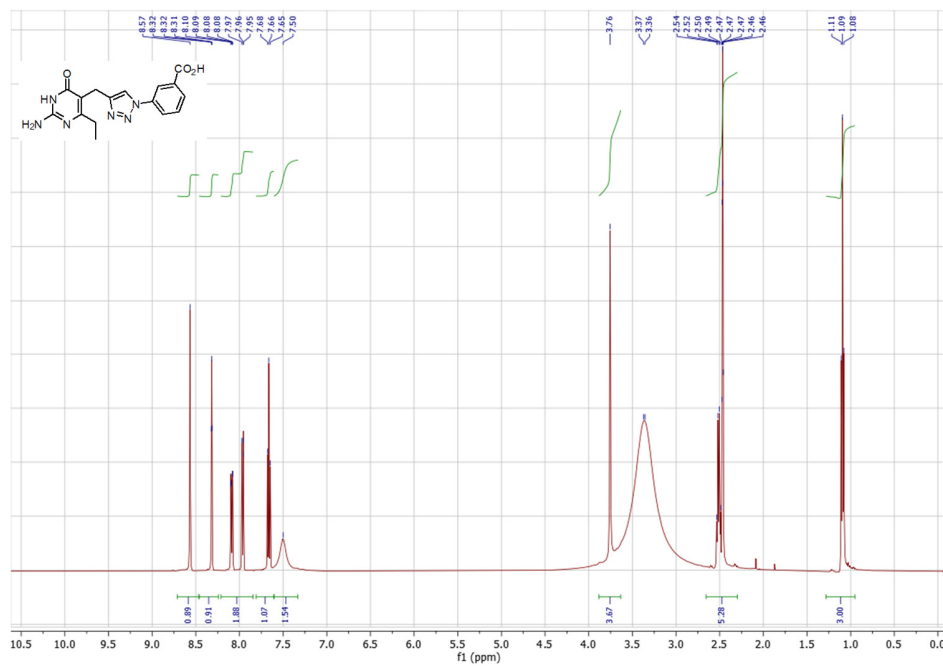

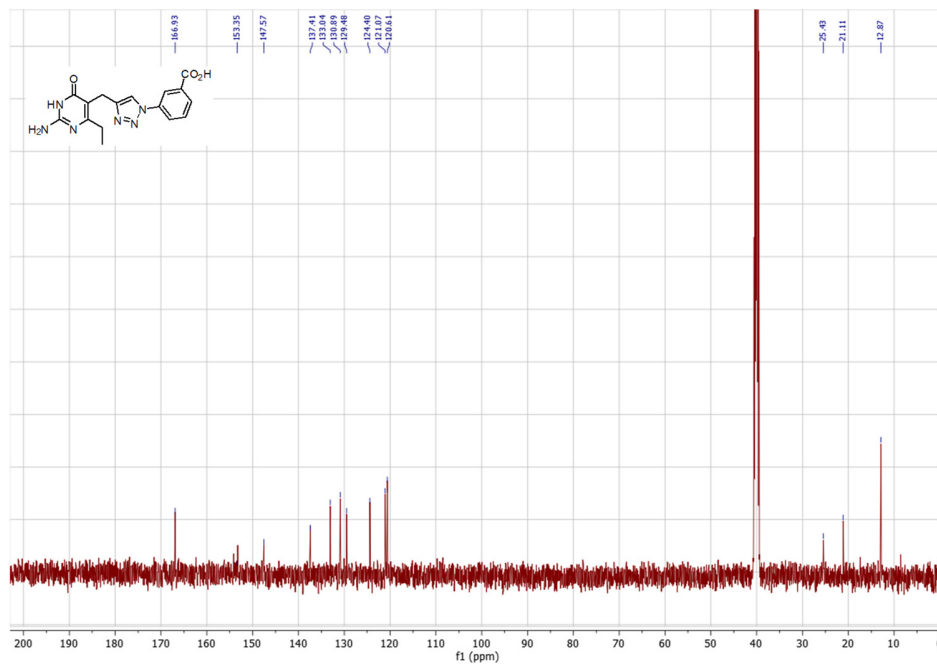

Acq. Data Name: 20220218\_high\_B12101\_40V.  
 Creation Parameters: Average[MS[1] Time:0.71..0.78]-1.0\*Average[MS[1] Time:0.02..0.12]  
 Comment:

Experiment Date/Time: 2/18/2022 12:27:21 PM  
 Ionization Mode: ESI+  
 Acquired m/z Range: 100.00..1000.00  
 Detector Volt: 2000[V]  
 Orifice1 Volt: 40V

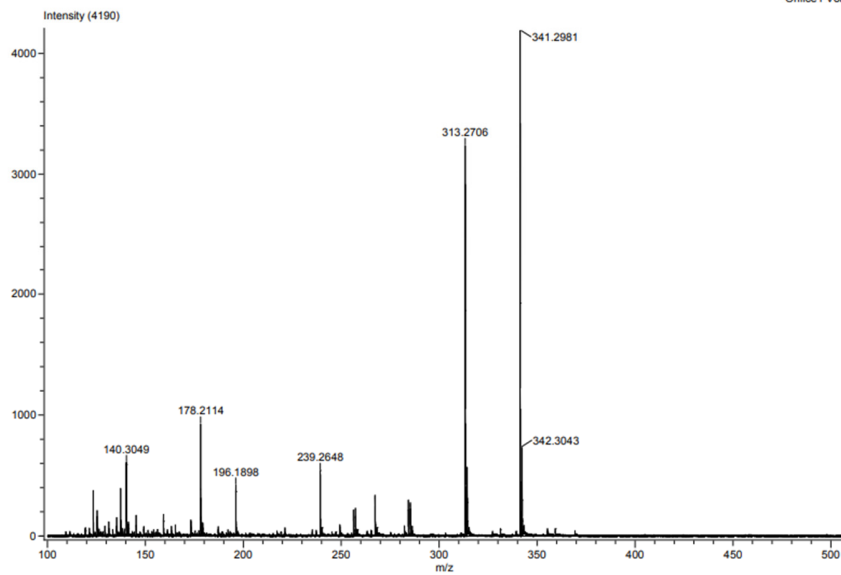

- $^1\text{H}$  (400 MHz,  $\text{DMSO-}d_6$ ) and  $^{13}\text{C}$  (101 MHz,  $\text{DMSO-}d_6$ ) NMR spectra and DART-TOF HRMS spectrum of 2-amino-6-ethyl-5-((1-(3-(nitro)phenyl)-1H-1,2,3-triazol-4-yl)methyl)pyrimidin-4(3H)-one (**10**)

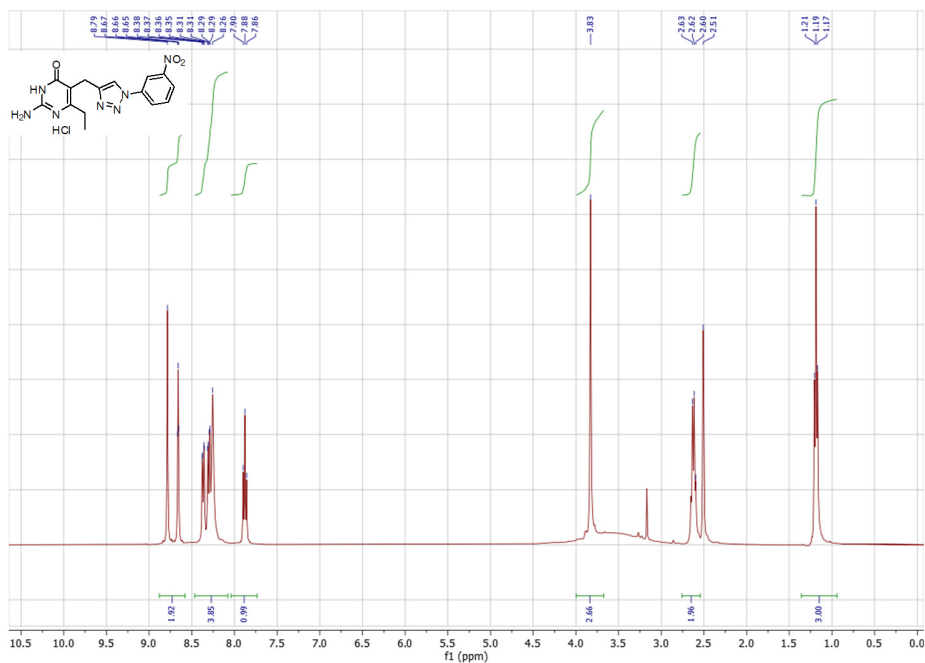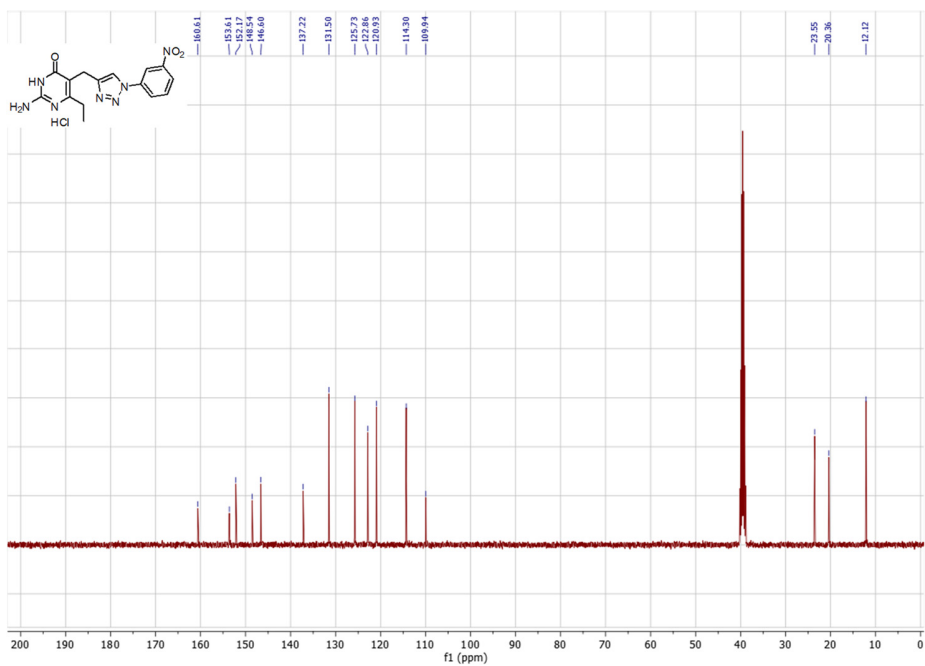

Acq. Data Name: 20220315\_high\_B12107\_70V  
 Creation Parameters: Average[MS(1)] Time:1.26-1.81-1.0-Average[MS(1)] Time:0.03-0.24  
 Comment:

Experiment Date/Time: 3/15/2022 3:49:06 PM  
 Ionization Mode: ESI+  
 Acquired m/z Range: 100.00-1000.00  
 Detector Volt: 2000[V]  
 Orifice 1 Volt: 70V

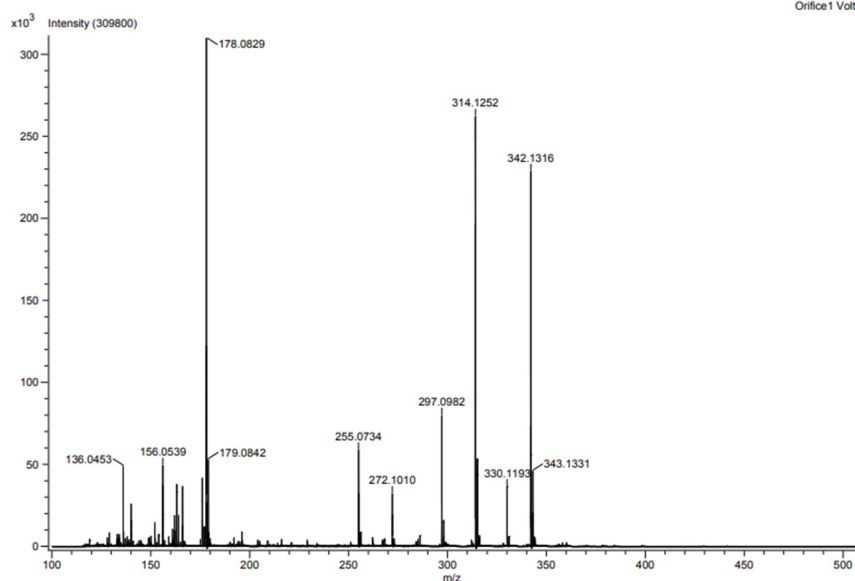

- $^1\text{H}$  (400 MHz,  $\text{DMSO}-d_6$ ) and  $^{13}\text{C}$  (101 MHz,  $\text{DMSO}-d_6$ ) NMR spectra and DART-TOF HRMS spectrum of 2-amino-6-ethyl-5-(2-(1-(4-(carboxy)phenyl)-1H-1,2,3-triazol-4-yl)ethyl)pyrimidin-4(3H)-one (**11**)

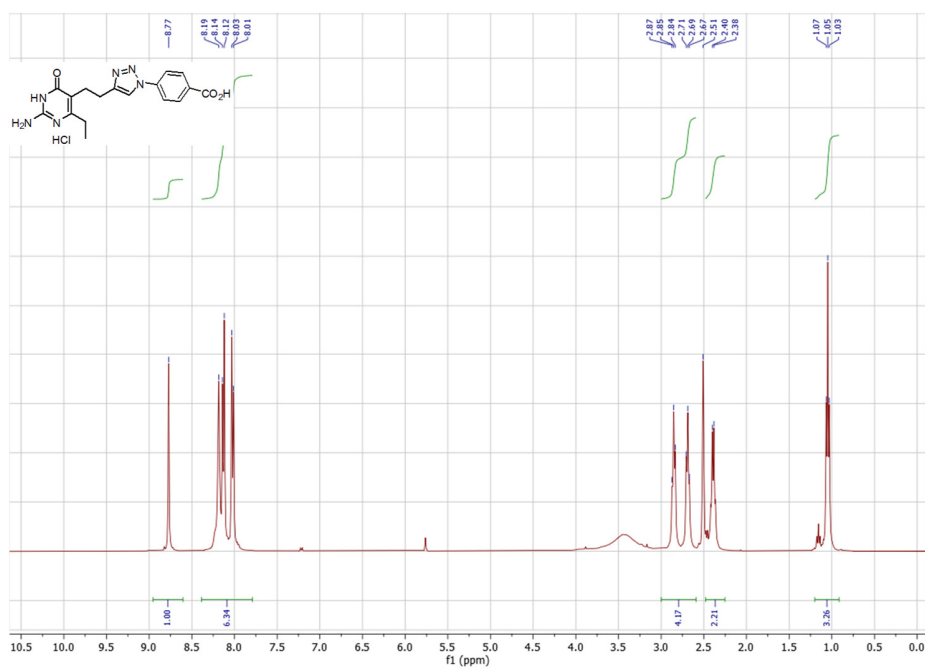



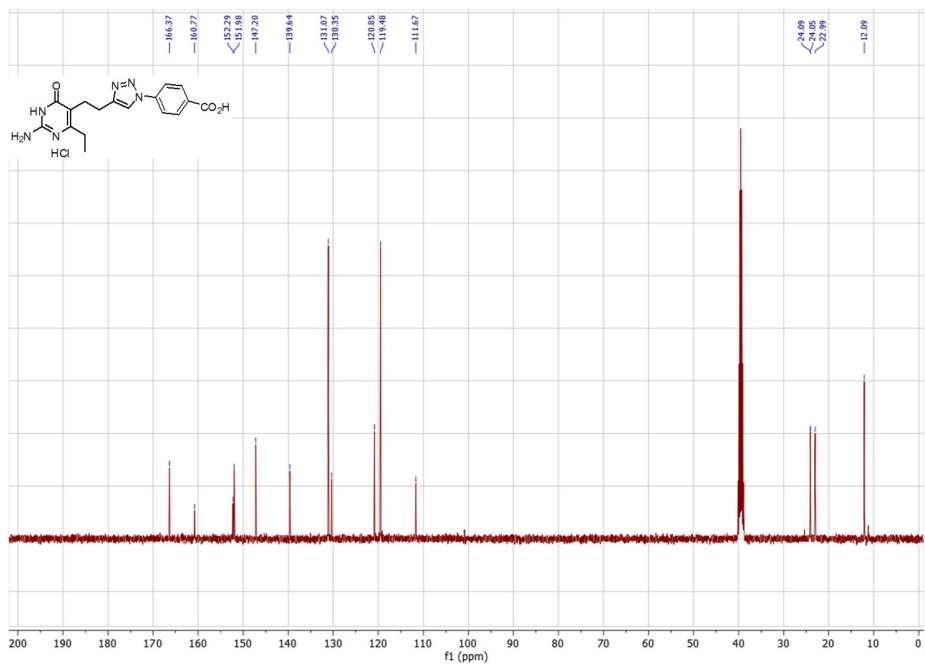

Acq. Data Name: 20220315\_high\_B12094\_40V  
 Creation Parameters: Average[MS[1] Time:0.85..1.15]-1.0\*Average[MS[1] Time:0.02..0.17]  
 Comment:

Experiment Date/Time: 3/15/2022 3:55:42 PM  
 Ionization Mode: ESI+  
 Acquired m/z Range: 100.00..1000.00  
 Detector Volt: 2000[V]  
 Orifice1 Volt: 40V

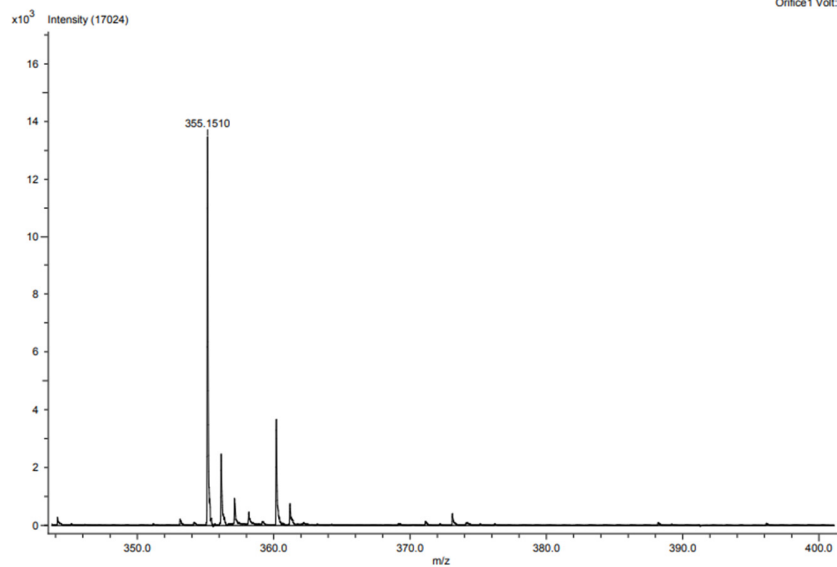

- $^1\text{H}$  (400 MHz,  $\text{DMSO-}d_6$ ) and  $^{13}\text{C}$  (101 MHz,  $\text{DMSO-}d_6$ ) NMR spectra and DART-TOF HRMS spectrum of 2-amino-6-ethyl-5-(2-(1-(3-(carboxy)phenyl)-1H-1,2,3-triazol-4-yl)ethyl)pyrimidin-4(3H)-one (**12**)

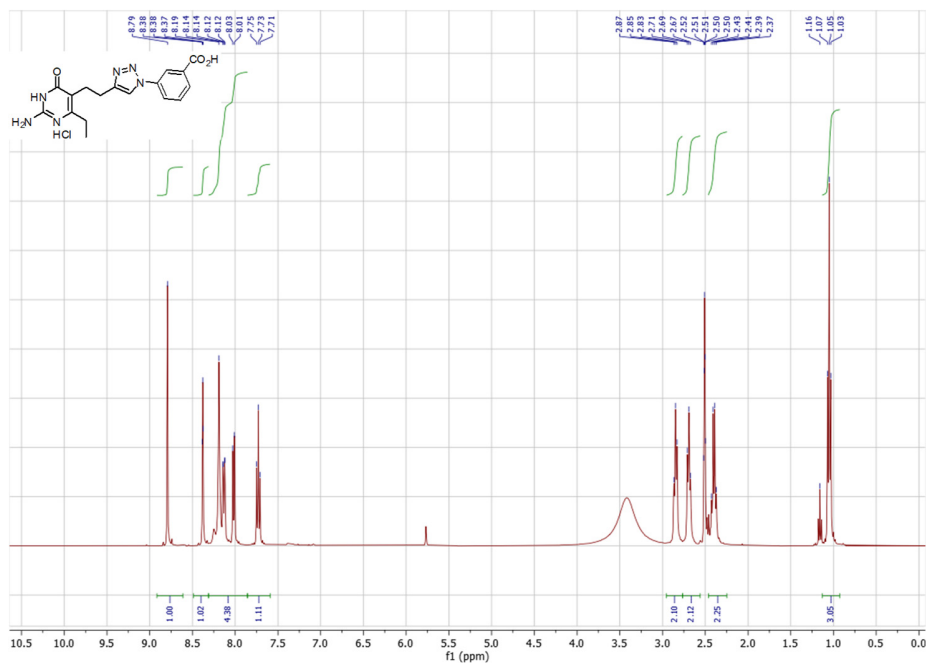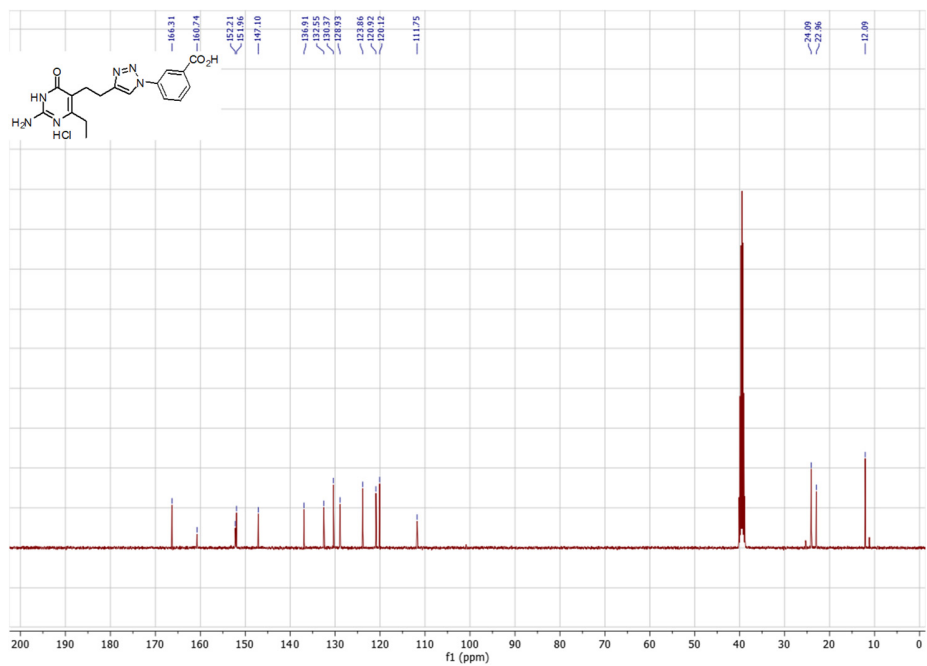



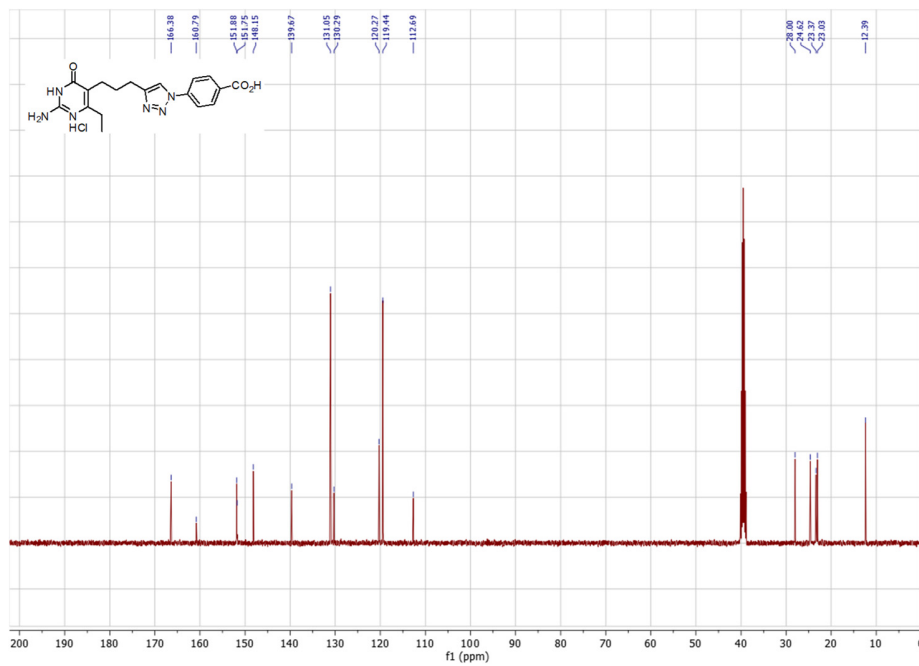

Acq. Data Name: 20220315\_high\_B12097\_40V  
 Creation Parameters: Average[MS[1] Time:1.05..1.41]-1.0°Average[MS[1] Time:0.02..0.14]  
 Comment:

Experiment Date/Time: 3/15/2022 4:16:57 PM  
 Ionization Mode: ESI+  
 Acquired m/z Range: 100.00..1000.00  
 Detector Volt: 2000[V]  
 Orifice1 Volt: 40V

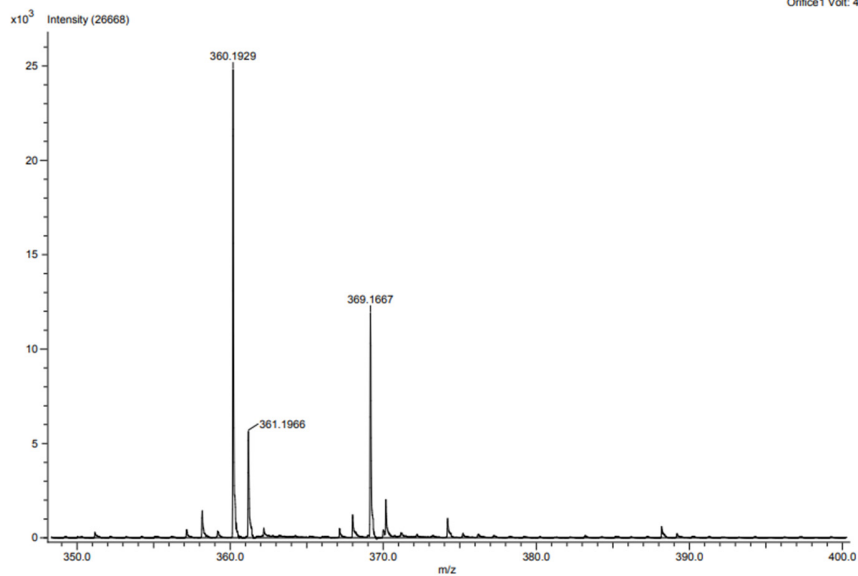

- $^1\text{H}$  (400 MHz,  $\text{DMSO-}d_6$ ) and  $^{13}\text{C}$  (100 MHz,  $\text{DMSO-}d_6$ ) NMR spectra and DART-TOF HRMS spectrum of 2-amino-6-ethyl-5-(3-(1-(3-(carboxy)phenyl)-1H-1,2,3-triazol-4-yl)propyl)pyrimidin-4(3H)-one (**14**)

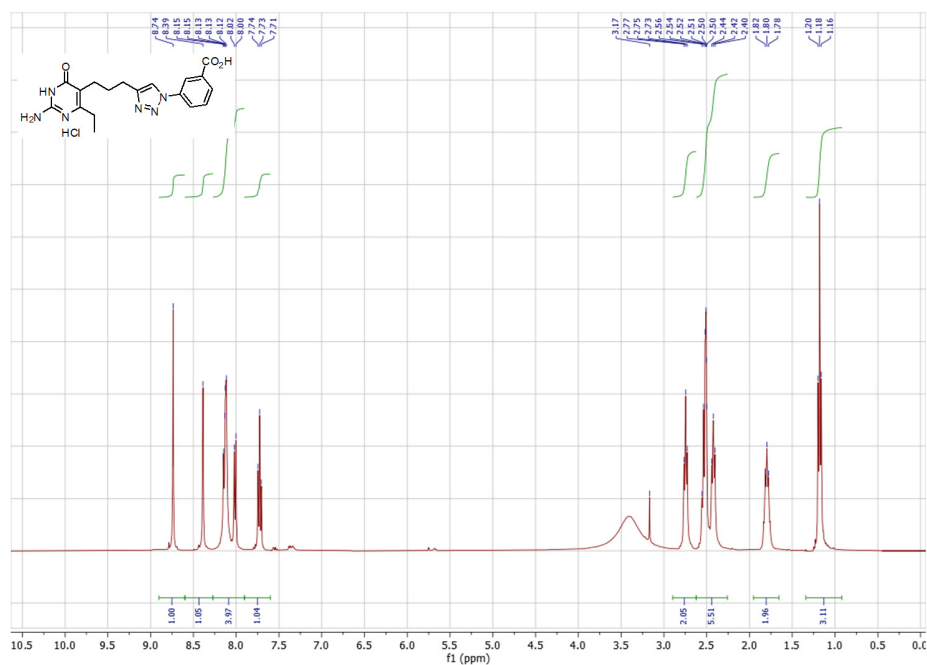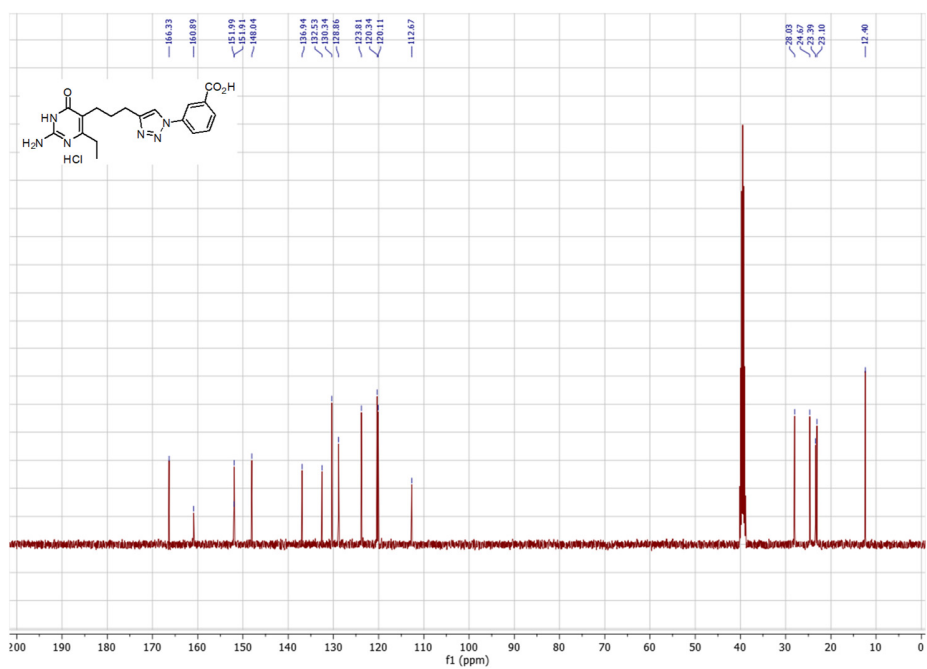

Acq. Data Name: 20220315\_high\_B12098\_40V  
Creation Parameters: Average(MS[1] Time:1.07..1.68)-1.0\*Average(MS[1] Time:0.02..0.19)  
Comment:

Experiment Date/Time: 3/15/2022 4:27:35 PM  
Ionization Mode: ESI+  
Acquired m/z Range: 100.00..1000.00  
Detector Volt: 2000[V]  
Orifice1 Volt: 40V

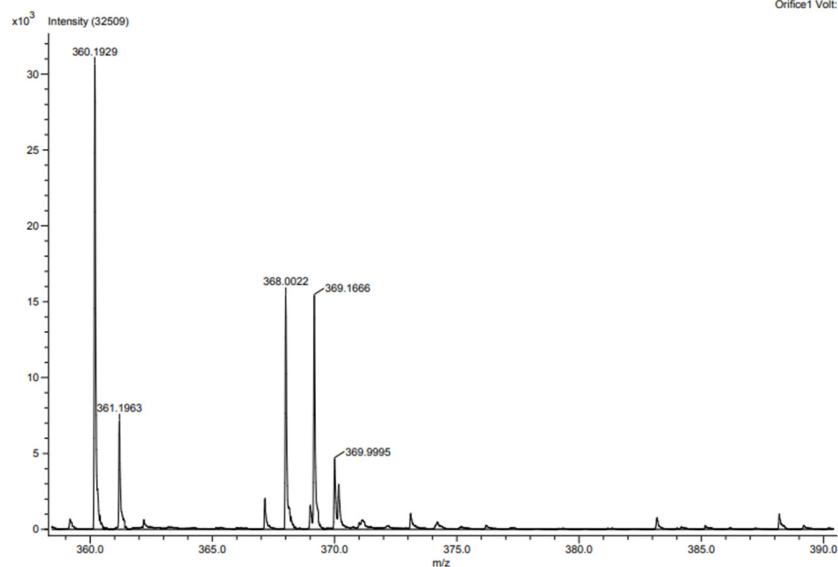

**Figure S2:** Protein sequencing result for *Pf*HPPK-GFP. Peptides observed by LC-MS/MS appear in blue, post-translational modifications appear as mentioned in the legend.

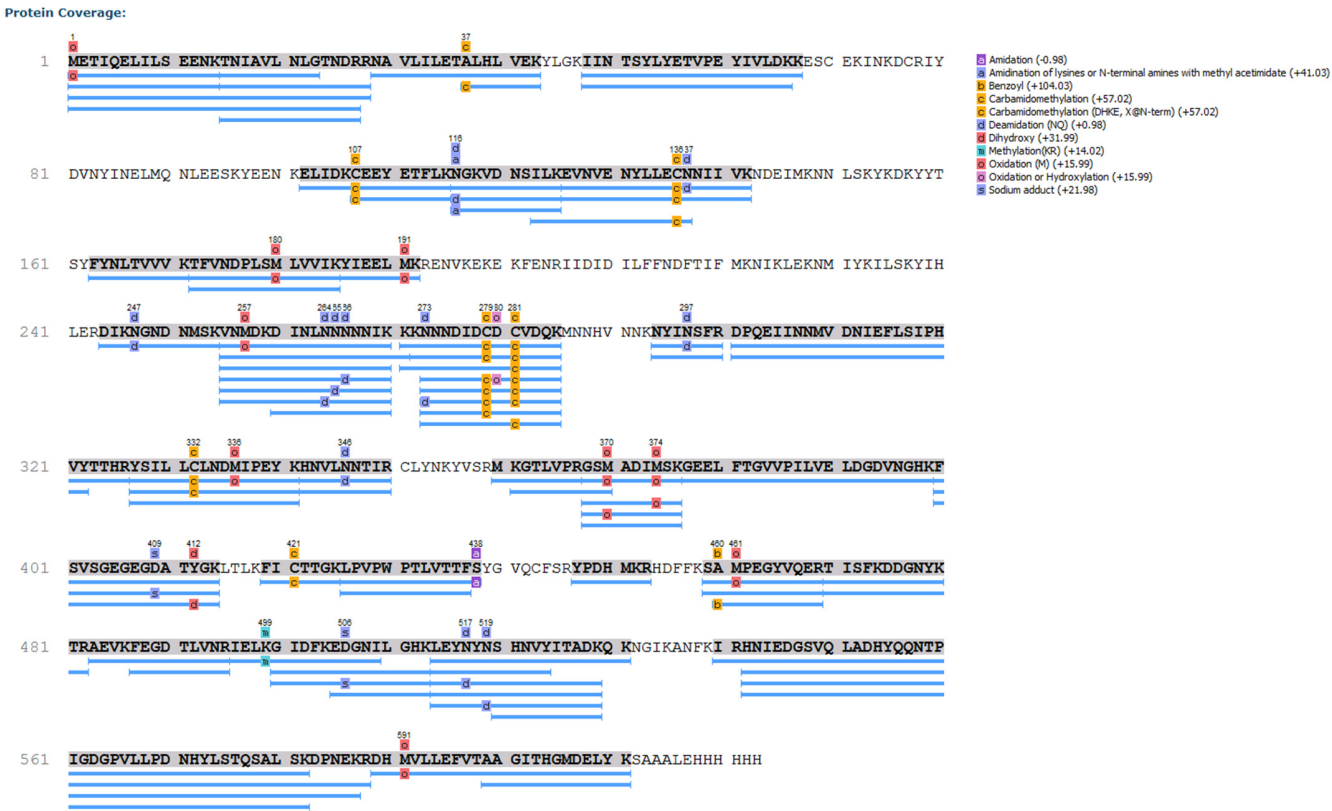

**Figure S3:** GFP melting temperature in the presence of various concentrations of ATP.

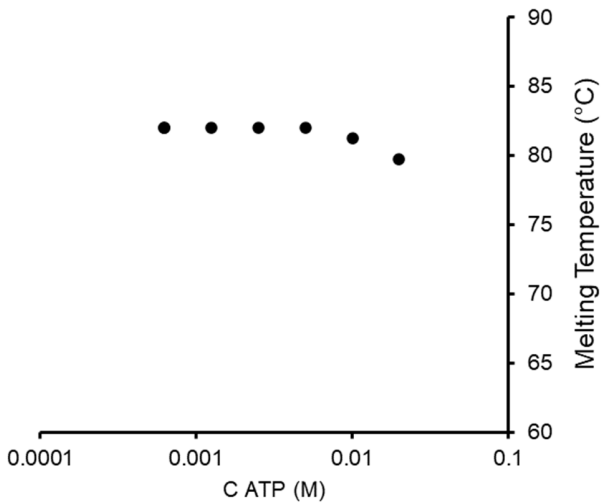

**Figure S4:** DSF curves obtained for HPPK-GFP and GFP proteins.

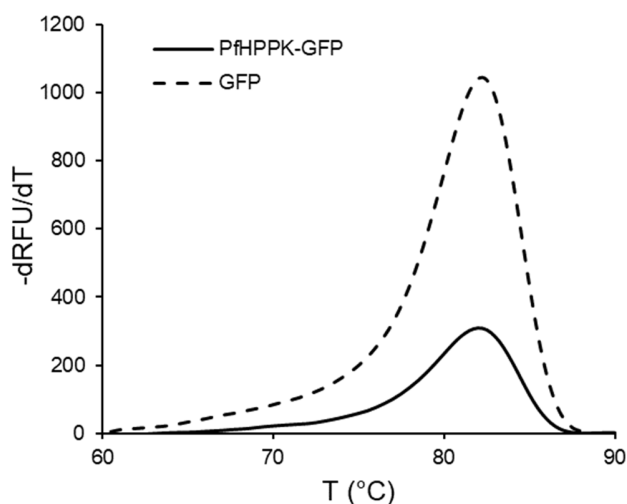

**Table S1.** Molecular docking scores obtained from antifolate library virtual screening. Hit compounds appear in bold.

| Code      | Smiles                                                                                        | Docking score |
|-----------|-----------------------------------------------------------------------------------------------|---------------|
| B293      | <chem>CN(C(N=C(N)N1)=C2C1=O)N=C(CC(N)=O)C2=O</chem>                                           | -8.85         |
| B266      | <chem>CN(C(N=C(N)N1)=C2C1=O)N=C(C(O)=O)C2=O</chem>                                            | -8.64         |
| <b>13</b> | <chem>CCC(N=C(N)N1)=C(CCCc2cn(-c(cc3)ccc3C(O)=O)nn2)C1=O.Cl</chem>                            | -8.63         |
| <b>14</b> | <chem>CCC(N=C(N)N1)=C(CCCc2cn(-c3cc(C(O)=O)ccc3)nn2)C1=O.Cl</chem>                            | -8.48         |
| B099      | <chem>CCC(N=C(N)N1)=C(CCCc2cn(-c(cc3)ccc3[N+])([O-])=O)nn2)C1=O.Cl</chem>                     | -8.48         |
| B109      | <chem>CCC(N=C(N)N1)=C(CCCc2cn(-c3cccc([N+])([O-])=O)c3)nn2)C1=O.Cl</chem>                     | -8.43         |
| <b>10</b> | <chem>CCC(N=C(N)N1)=C(Cc2cn(-c3cccc([N+])([O-])=O)c3)nn2)C1=O.Cl</chem>                       | -8.38         |
| B244      | <chem>CC(C(O)=O)C(C1=O)=NN(C)C(N=C(N)N2)=C1C2=O</chem>                                        | -8.34         |
| <b>11</b> | <chem>CCC(N=C(N)N1)=C(CCc2cn(-c(cc3)ccc3C(O)=O)nn2)C1=O.Cl</chem>                             | -8.30         |
| B105      | <chem>CNC(N=C(N)NC1=O)=C1[N+])([O-])=O</chem>                                                 | -8.17         |
| B324      | <chem>CCc1nc(N)nc(N)c1OCCCOc(cc1)cc2c1c(C([O-])=O)cn2CCCOc(cc1)cc2c1c(C([O-])=O)c[nH]2</chem> | -8.15         |
| B453      | <chem>NC(N1)=Nc2nn(-c3cccc(C(NCc(cc4)ccc4Cl)=O)c3)nc2C1=O</chem>                              | -8.09         |
| B267      | <chem>CC(C(c(nc12)cnc1N=C(N)NC2=O)O)O</chem>                                                  | -8.07         |
| B302      | <chem>CCc1nc(N)nc(N)c1OCCCOc1cccc(C(N[C@@H](CCC([O-])=O)C([O-])=O)=O)c1</chem>                | -7.96         |
| B265      | <chem>CN(C(N=C(N)N1)=C2C1=O)N=C(CC(O)=O)C2=O</chem>                                           | -7.91         |
| <b>12</b> | <chem>CCC(N=C(N)N1)=C(CCc2cn(-c3cc(C(O)=O)ccc3)nn2)C1=O.Cl</chem>                             | -7.91         |
| B106      | <chem>CCC(N=C(N)N1)=C(Cc2cn(-c(cc3)ccc3[N+])([O-])=O)nn2)C1=O.Cl</chem>                       | -7.88         |
| B108      | <chem>CCC(N=C(N)N1)=C(CCc2cn(-c3cccc([N+])([O-])=O)c3)nn2)C1=O.Cl</chem>                      | -7.77         |
| B387      | <chem>NC(NC1=O)=Nc([nH]2)c1nc2SCC(c1cccc1)=O</chem>                                           | -7.71         |
| B388      | <chem>NC(NC1=O)=Nc([nH]2)c1nc2SCc1cccc1</chem>                                                | -7.42         |



|          |                                                                      |       |
|----------|----------------------------------------------------------------------|-------|
| B291     | <chem>NC(N1)=NC(NN=C(CC(O)=O)C2=O)=C2C1=O</chem>                     | -7.39 |
| B367     | <chem>Nc1nc(N)nc(O)c1/N=N/c(cc1)ccc1Cl</chem>                        | -7.37 |
| B332     | <chem>Nc(nc(N)nc1O)c1/N=N/c1cccc1</chem>                             | -7.35 |
| B365     | <chem>Nc1nc(N)nc(O)c1/N=N/c(cc1)ccc1F</chem>                         | -7.33 |
| B366     | <chem>Cc(cc1)ccc1/N=N/c1c(N)nc(N)nc1O</chem>                         | -7.26 |
| B294     | <chem>CN(C(N=C(N)N1)=C2C1=O)N=C(CCO)C2=O</chem>                      | -7.16 |
| B369     | <chem>Nc1nc(N)nc(O)c1/N=N/c1cccc(Cl)c1</chem>                        | -7.14 |
| B370     | <chem>Nc1nc(N)nc(O)c1/N=N/c1cccc(C(F)(F)F)c1</chem>                  | -7.11 |
| <b>6</b> | <chem>CC(N=C(N)N1)=C(Cc2cn(-c(cc3)ccc3C(O)=O)nn2)C1=O.Cl</chem>      | -6.86 |
| B346     | <chem>COC(c1cc(/N=N/c(c(N)nc(N)n2)c2O)ccc1)=O</chem>                 | -6.86 |
| B256     | <chem>NC(N=C(N)NC1=O)=C1[N+](O)=O</chem>                             | -6.85 |
| B035     | <chem>CCc1nc(N)nc(N)c1OCCc1cn(Cc(cc2)ccc2C(O)=O)nn1.Cl</chem>        | -6.72 |
| B368     | <chem>Nc1nc(N)nc(O)c1/N=N/c(cccc1)c1C(O)=O</chem>                    | -6.70 |
| B065     | <chem>CCc1nc(N)nc(N)c1OCCc1cn(-c2cccc(C(O)=O)c2)nn1.Cl</chem>        | -6.52 |
| B036     | <chem>CCc1nc(N)nc(N)c1OCCc1cn(-c(cc2)ccc2C(O)=O)nn1.Cl</chem>        | -6.44 |
| B264     | <chem>Nc1nc(N)nc(N)c1[N+](O)=O</chem>                                | -6.38 |
| B217     | <chem>CNc(nc(N)nc1N)c1[N+](O)=O</chem>                               | -6.10 |
| B218     | <chem>COC(c(cc1)ccc1NCc1nc2c(N)nc(N)nc2nc1)=O</chem>                 | -6.09 |
| <b>1</b> | <chem>COc(nc(N)nc1N)c1/N=N/c1cccc([N+](O)=O)c1</chem>                | -6.03 |
| B032     | <chem>CCc1nc(N)nc(N)c1OCc1cn(-c2cccc(C(O)=O)c2)nn1.Cl</chem>         | -5.98 |
| B220     | <chem>Nc1c2nc(CNc3cccc(Cl)c3)cnc2nc(N)n1</chem>                      | -5.94 |
| B341     | <chem>Nc(nc(N)nc1Cl)c1/N=N/c1cc([N+](O)=O)ccc1</chem>                | -5.83 |
| B050     | <chem>CCc1nc(N)nc(N)c1OCCc1cn(-c(cc2)ccc2C(O)=O)nn1.Cl</chem>        | -5.71 |
| B245     | <chem>Nc1c2nc[nH]c2cnn1</chem>                                       | -5.67 |
| <b>9</b> | <chem>CCC(N=C(N)N1)=C(Cc2cn(-c3cc(C(O)=O)ccc3)nn2)C1=O.Cl</chem>     | -5.64 |
| B249     | <chem>Nc1c2[nH]cnc2c(N)nn1</chem>                                    | -5.64 |
| <b>7</b> | <chem>CC(N=C(N)N1)=C(Cc2cn(-c3cc(C(O)=O)ccc3)nn2)C1=O.Cl</chem>      | -5.51 |
| B066     | <chem>CCc1nc(N)nc(N)c1OCCc1cn(-c2cccc(C(O)=O)c2)nn1.Cl</chem>        | -5.46 |
| <b>3</b> | <chem>COc(nc(N)nc1N)c1/N=N/c1cccc(C(O)=O)c1</chem>                   | -5.36 |
| <b>4</b> | <chem>Nc1nc(N)nc(N)c1/N=N/c1cccc1</chem>                             | -5.21 |
| <b>5</b> | <chem>Nc1nc(N)nc(N)c1/N=N/c1cccc(C(O)=O)c1</chem>                    | -5.18 |
| B096     | <chem>CCC(N=C(N)N1)=C(CCc2cn(-c(cc3)ccc3[N+](O)=O)nn2)C1=O.Cl</chem> | -5.12 |
| <b>2</b> | <chem>COC(c1cccc(/N=N/c2c(N)nc(N)nc2Cl)c1)=O</chem>                  | -5.06 |
| <b>8</b> | <chem>CCC(N=C(N)N1)=C(Cc2cn(-c(cc3)ccc3C(O)=O)nn2)C1=O.Cl</chem>     | -4.38 |

**Figure S5:** Dose-response inhibition for compound **14**.

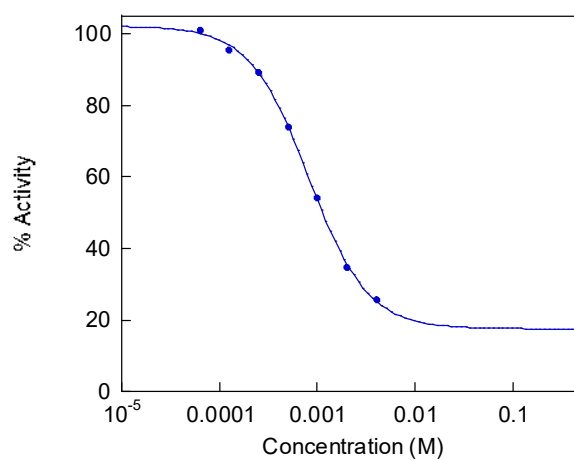

**Figure S6.** Superimposition of *Pf*HPPK structures in the apo form (purple) and HMDP-bound form (cyan). Region presenting high RMSD between the two forms are represented in yellow and pink, respectively. Substrates and bound Mg<sup>2+</sup> ions are in green.

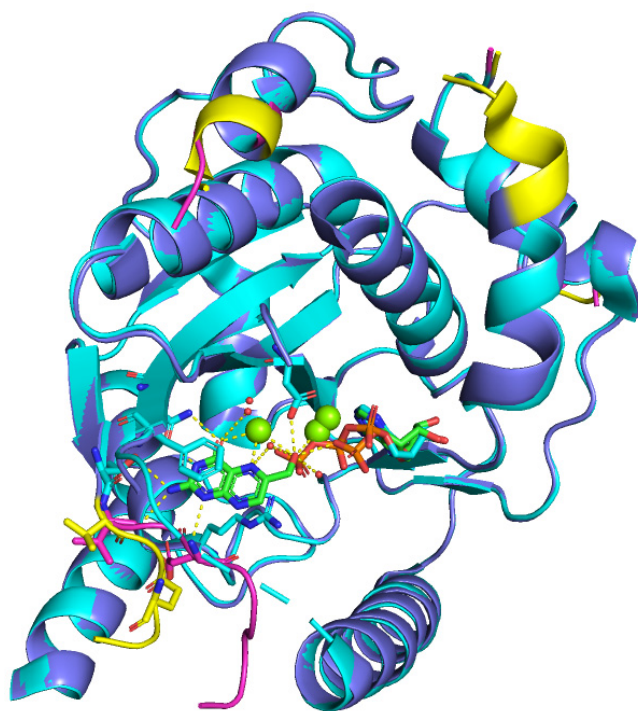

Supplement: s1 [file s1]
